# Supplementary material for: DarkSide-20k sensitivity to light dark matter particles
Source: Springer Nature journal article supplement (doi:10.1038/s42005-024-01896-z), 2024-12-26
Supplement: MOESM2 [file 42005_2024_1896_MOESM2_ESM.pdf › 42005_2024_1896_MOESM2_ESM.pdf]

## Supplementary material

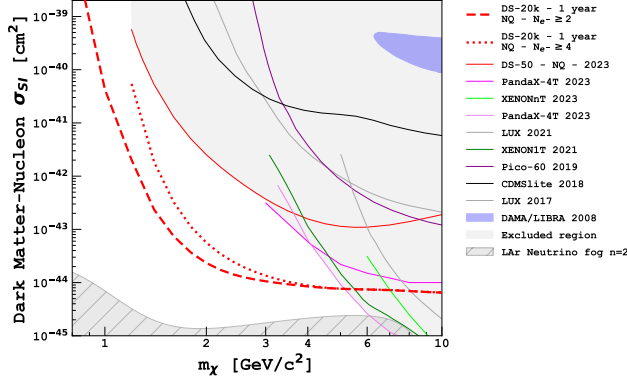

Supplementary FIG. 1. Expected DS-20k 90% C.L. exclusion limits for spin-independent WIMP NR without quenching fluctuations (NQ) are shown as bold red lines (dotted: fit from  $N_e=4$ , dashed: fit from  $N_e=2$ ). One year of data is assumed. They are compared to the published 90% C.L. limits from DS-50 [14] and from other experiments [7, 24–30], with currently excluded parameter space shaded in light gray, as well as claimed discovery from Ref.[31]. The neutrino fog in LAr with index  $n = 2$  [32] is also shown. A local dark matter density of  $0.3 \text{ GeV c}^{-2} \text{ cm}^{-3}$  is assumed.

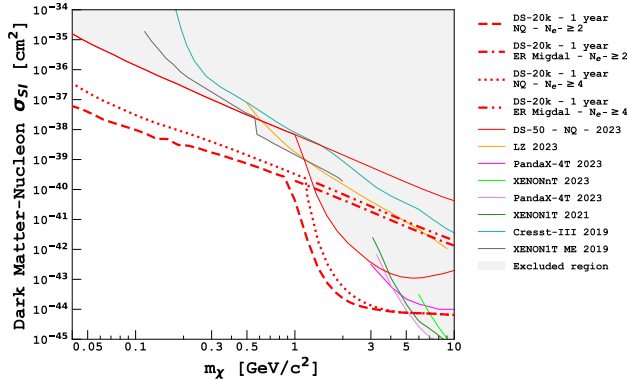

Supplementary FIG. 2. Expected DS-20k upper limits at 90% C.L. for spin-independent WIMP-nucleon cross-section when considering the Migdal effect and without quenching fluctuations (NQ) for the NR signal (bold red lines, dotted: fit from  $N_e=4$ , dashed: fit from  $N_e=2$ ). One year of data is assumed. These results are compared to the published 90% C.L. limits from DS-50 [15] and other experiments [7, 24–26, 34, 35, 41], with currently excluded parameter space shaded in light gray. A local dark matter density of  $0.3 \text{ GeV c}^{-2} \text{ cm}^{-3}$  is assumed.

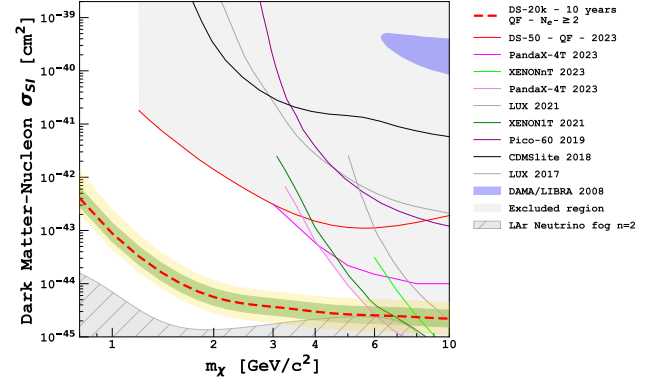

Supplementary FIG. 3. Expected DS-20k 90% C.L. exclusion limits for spin-independent WIMP NR with quenching fluctuations (QF) are shown as bold dashed red line (fit from  $N_e=2$ ), with the  $\pm 1\text{-}\sigma$  (green shaded area) and  $\pm 2\text{-}\sigma$  (yellow shaded area) bands. Ten years of data are assumed. They are compared to the published 90% C.L. limits from DS-50 [14] and from other experiments [7, 24–30], with currently excluded parameter space shaded in light gray, as well as claimed discovery from Ref. [31]. The neutrino fog in LAr with index  $n = 2$  [32] is also shown. A local dark matter density of  $0.3 \text{ GeV c}^{-2} \text{ cm}^{-3}$  is assumed.

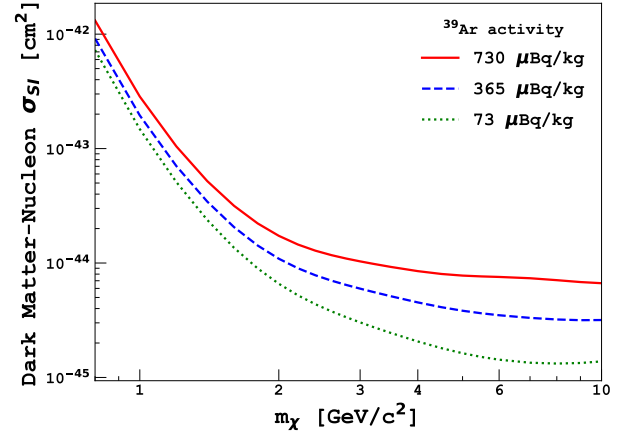

Supplementary FIG. 4. Expected DS-20k 90% C.L. exclusion limits for spin-independent WIMP NR with quenching fluctuations (QF) (fit from  $N_e=2$ ), for three levels of  $^{39}\text{Ar}$  activity:  $730 \mu\text{Bq kg}^{-1}$  (nominal, full red line),  $365 \mu\text{Bq kg}^{-1}$  (dashed blue line) and  $73 \mu\text{Bq kg}^{-1}$  (dotted green line). One year of data and a local dark matter density of  $0.3 \text{ GeV c}^{-2} \text{ cm}^{-3}$  are assumed.
